# Supplementary material for: Protein Kinase CK2 Is Upregulated by Calorie Restriction and Induces Autophagy
Source: PubMed Central journal article supplement — Mol Cells. 2021 Dec 15;45(3):112–21. doi: 10.14348/molcells.2021.0183 (PMC8926869; doi:10.14348/molcells.2021.0183), 2021-12-15
Supplement: molce-45-3-112-supple.pdf [file molce-45-3-112-supple.pdf]

Supplementary Table S1. Sequences of primers used for RT-PCR

| Gene               |         | Primer sequence             |
|--------------------|---------|-----------------------------|
| CK2 $\alpha$ (h)   | Forward | 5'-AAGACCCTGTGTCACGAACCC-3' |
|                    | Reverse | 5'-GGCTCCTCCGAAAGATCATAC-3' |
| SIRT1 (h)          | Forward | 5'-CAGTGGCTGGAACAGTGAGA-3'  |
|                    | Reverse | 5'-TCTGGCATGTCCCACTATCA-3'  |
| Beclin-1 (h)       | Forward | 5'-CTCTCGCAGATTCATCCCC-3'   |
|                    | Reverse | 5'-TGGGCATAACGCATCTGGTT-3'  |
| Ulk1 (h)           | Forward | 5'-CCTCATGGAGCAAGGCACA-3'   |
|                    | Reverse | 5'-CTCACGGTGCTGGAACATCT-3'  |
| $\beta$ -actin (h) | Forward | 5'-TCCCTGGAGAAGAGCTACGA-3'  |
|                    | Reverse | 5'-AGCACTGTGTTGGCGTACAG-3'  |
| bec-1 (n)          | Forward | 5'-CAAAGAAGGCCAGATTCAGC-3'  |
|                    | Reverse | 5'-CGTTGTCGGATGGTTTTCTT-3'  |
| unc-51 (n)         | Forward | 5'-GCTGCTCTTGACGAGCTTTT-3'  |
|                    | Reverse | 5'-ACAAATCCCTGTCGTTCCAG-3'  |
| act-2 (n)          | Forward | 5'-CCCAATTGAGCATGGTATCG-3'  |
|                    | Reverse | 5'-AGCGTTCGTTCCAACAGTG-3'   |

h, human; n, nematode.

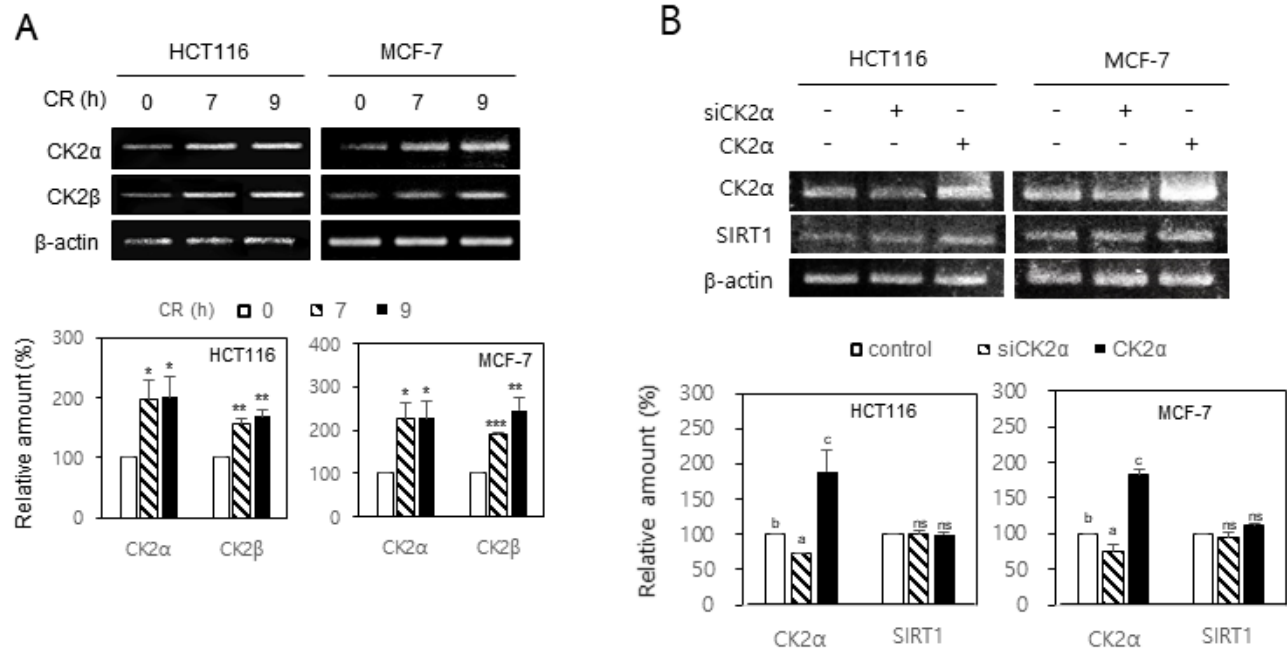

**Supplementary Fig. S1. CR upregulated CK2 $\alpha$  and SIRT1 at the transcription level, whereas CK2 upregulated SIRT1 at the post-translation level.** (A) HCT116 and MCF-7 cells were transfected with CK2 $\alpha$  siRNA for 1.5 days, then incubated under CR condition for 7 h. (B) Cells were transfected with CK2 $\alpha$  siRNA or pcDNA3.1-HA-CK2 $\alpha$  for 2 days. Total RNA was then extracted from cells, after which the level of each mRNA was determined by RT-PCR using specific primers and reverse transcriptase (top). Representative data from three independent experiments are shown.  $\beta$ -Actin was used as a control. The graphs represent the quantitation of each mRNA relative to  $\beta$ -actin (bottom). Data were reported as mean  $\pm$  SEM. \* $P$  < 0.05; \*\* $P$  < 0.01; \*\*\* $P$  < 0.001; ns, not significant. Bars that do not have the same letter (a, b, c) were significantly different among groups at  $P$  < 0.05.

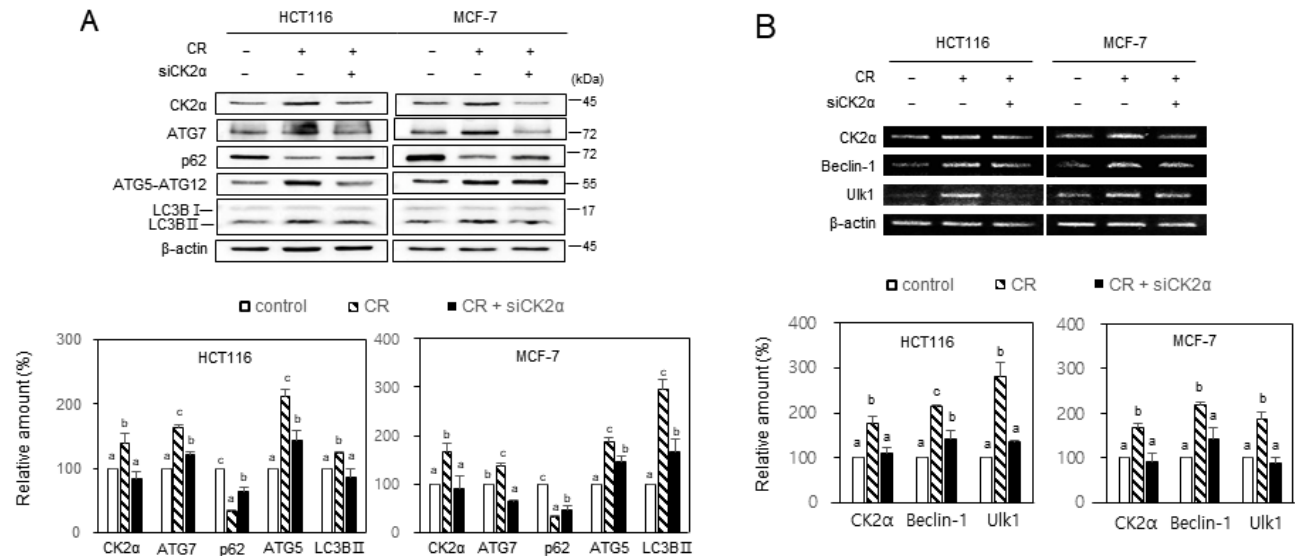

**Supplementary Fig. S2. CK2 $\alpha$  downregulation abrogated autophagy induction, caused by CR.** HCT116 and MCF-7 cells were transfected with CK2 $\alpha$  siRNA for 1.5 days, then incubated under CR condition for 7 h. The level of each protein (A) and mRNA (B) was determined by immunoblotting using specific antibodies and RT-PCR using specific primers, respectively (top). Representative data from three independent experiments are shown.  $\beta$ -Actin was used as a control. The graphs represent the quantitation of each protein and mRNA relative to  $\beta$ -actin (bottom). Data were reported as mean  $\pm$  SEM. Bars that do not have the same letter (a, b, c) were significantly different among groups at  $P < 0.05$ .

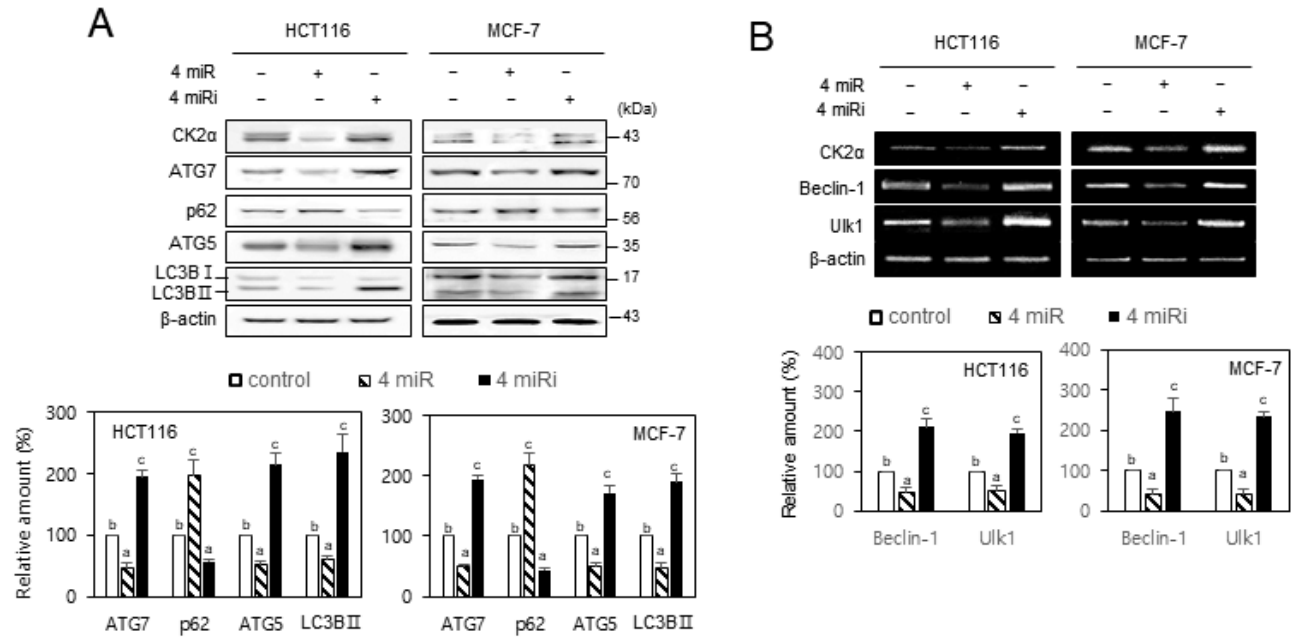

**Supplementary Fig. S3. Antisense inhibitors of miR-186, miR-216b, miR-337-3p, and miR-760 induced autophagy in human cancer cells.** MCF-7 and HCT116 cells were transfected with four miRs (miR-186, miR-216b, miR-337-3p, and miR-760) or antisense inhibitors of four miRs (4 miRi). The level of each protein (A) and mRNA (B) was determined by immunoblotting using specific antibodies and RT-PCR using specific primers, respectively (top). Representative data from three independent experiments are shown. β-Actin was used as a control. The graphs represent the quantitation of each protein and mRNA relative to β-actin (bottom). Data were reported as mean ± SEM. Bars that do not have the same letter (a, b, c) were significantly different among groups at  $P < 0.05$ .

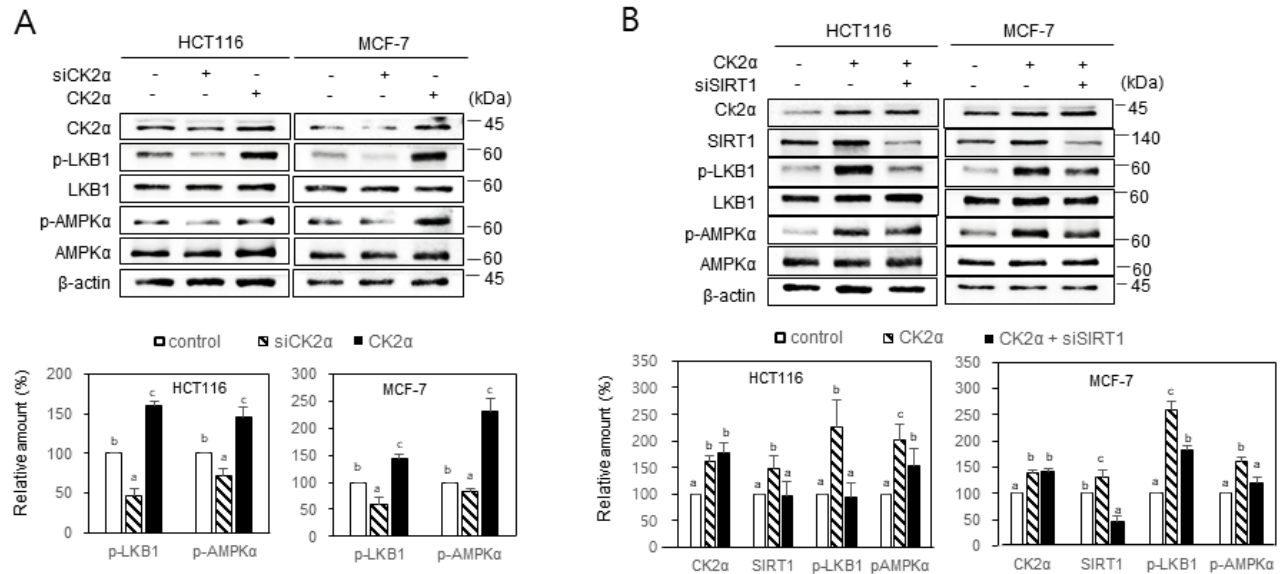

**Supplementary Fig. S4. CK2 activated AMPK through the SIRT1-LKB1 pathway in human cancer cells.** (A) HCT116 and MCF-7 cells were transfected with pcDNA3.1-HA-CK2 $\alpha$  or CK2 $\alpha$  siRNA for 2 days. (B) Cells were transfected with pcDNA3.1-HA-CK2 $\alpha$  for 2 days in the absence or presence of SIRT1 siRNA. The level of each protein was determined by immunoblotting using specific antibodies (top). Representative data from three independent experiments are shown.  $\beta$ -Actin was used as a control. The graphs represent the quantitation of p-AMPK (T172) and p-LKB1 (S428) relative to the unphosphorylated AMPK and LKB1 levels, respectively. The graphs represent the quantitation of CK2 $\alpha$  and SIRT1 relative to  $\beta$ -actin (bottom). Data were reported as mean  $\pm$  SEM. Bars that do not have the same letter (a, b, c) were significantly different among groups at  $P < 0.05$ .
